# Supplementary material for: Hidden genes in birds
Source: PubMed Central journal article supplement (PMC4539667; doi:10.1186/s13059-015-0724-z), 2015-08-18
Supplement: 13059_2015_724_MOESM2_ESM.pdf [file 13059_2015_724_MOESM2_ESM.pdf]

## Additional file 2

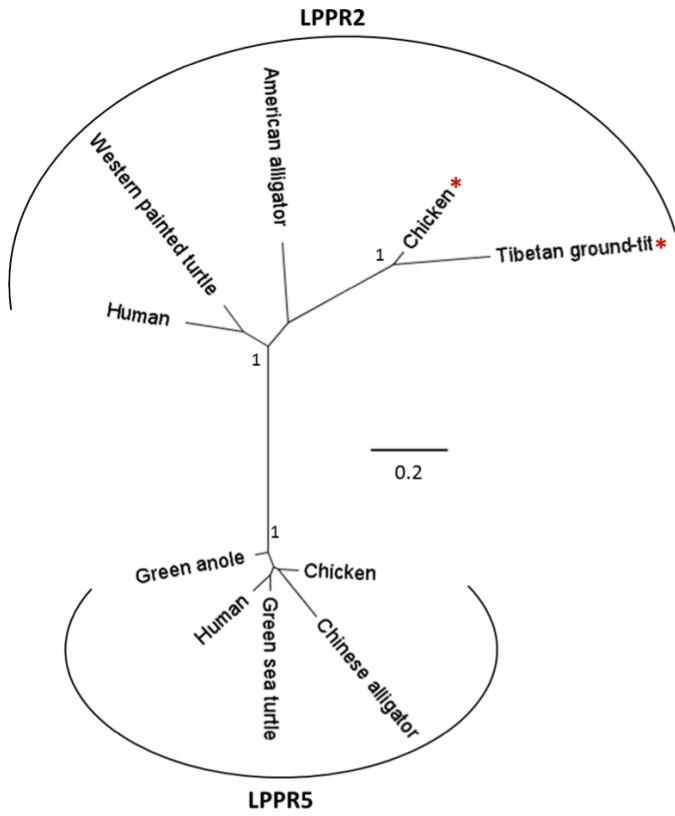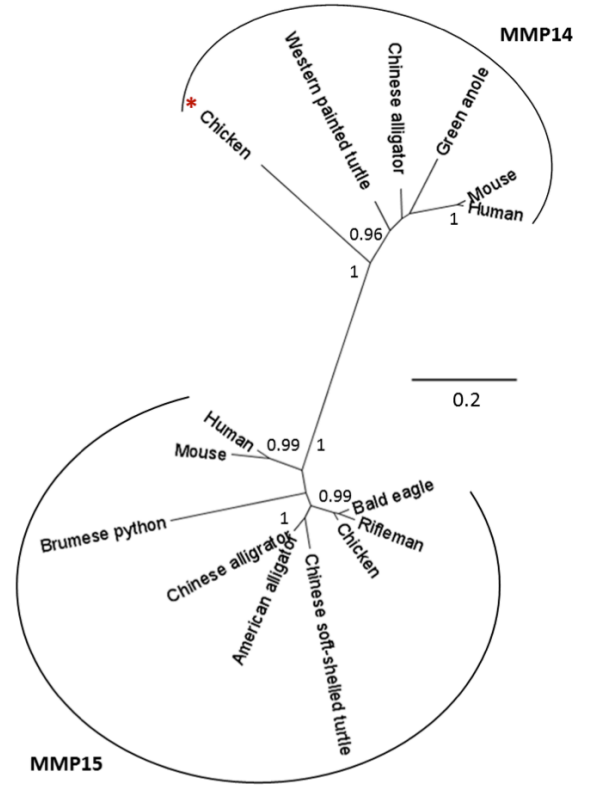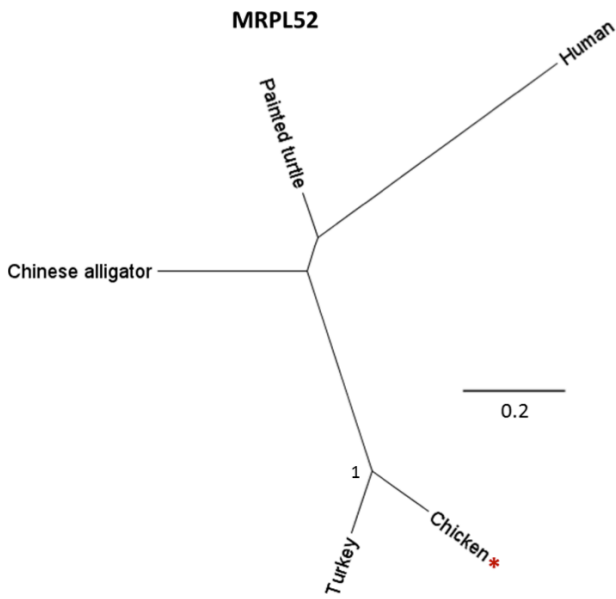

| <b>Gene</b> | <b>Organism</b>            | <b>Gene ID</b> |
|-------------|----------------------------|----------------|
| LPPR2       | Homo sapiens               | 282400943      |
| LPPR2like   | Alligator mississippiensis | 564246552      |
| LPPR2like   | Chrysemys picta bellii     | 530660999      |
| LPPR5       | Gallus gallus              | 513196992      |
| LPPR5       | Chelonia mydas             | 591375973      |
| LPPR5       | Anolis carolinensis        | 637292948      |
| LPPR5       | Alligator sinensis         | 557258930      |
| LPPR5       | Homo sapiens               | 82659092       |
| MMP14       | Mus musculus               | 188528636      |
| MMP14       | Homo sapiens               | 526479827      |
| MMP14       | Chrysemys picta bellii     | 530593169      |
| MMP14       | Anolis carolinensis        | 637354335      |
| MMP14       | Alligator sinensis         | 557328456      |
| MMP15       | Mus musculus               | 55926148       |
| MMP15       | Gallus gallus              | 513202660      |
| MMP15       | Haliaeetus leucocephalus   | 729724462      |
| MMP15       | Acanthisitta chloris       | 677986855      |
| MMP15       | Python bivittatus          | 602669425      |
| MMP15       | Alligator mississippiensis | 564265923      |
| MMP15       | Pelodiscus sinensis        | 558185053      |
| MMP15       | Alligator sinensis         | 557270018      |
| MMP15       | Homo sapiens               | 45594662       |
| MRPL52      | Meleagris gallopavo        | 733928499      |
| MRPL52      | Alligator sinensis         | 557328460      |
| MRPL52      | Chrysemys picta bellii     | 530593173      |
| MRPL52      | Homo sapiens               | 169646288      |
