# Supplementary material for: Hidden genes in birds
Source: PubMed Central journal article supplement (PMC4539667; doi:10.1186/s13059-015-0724-z), 2015-08-18

### Additional file 3

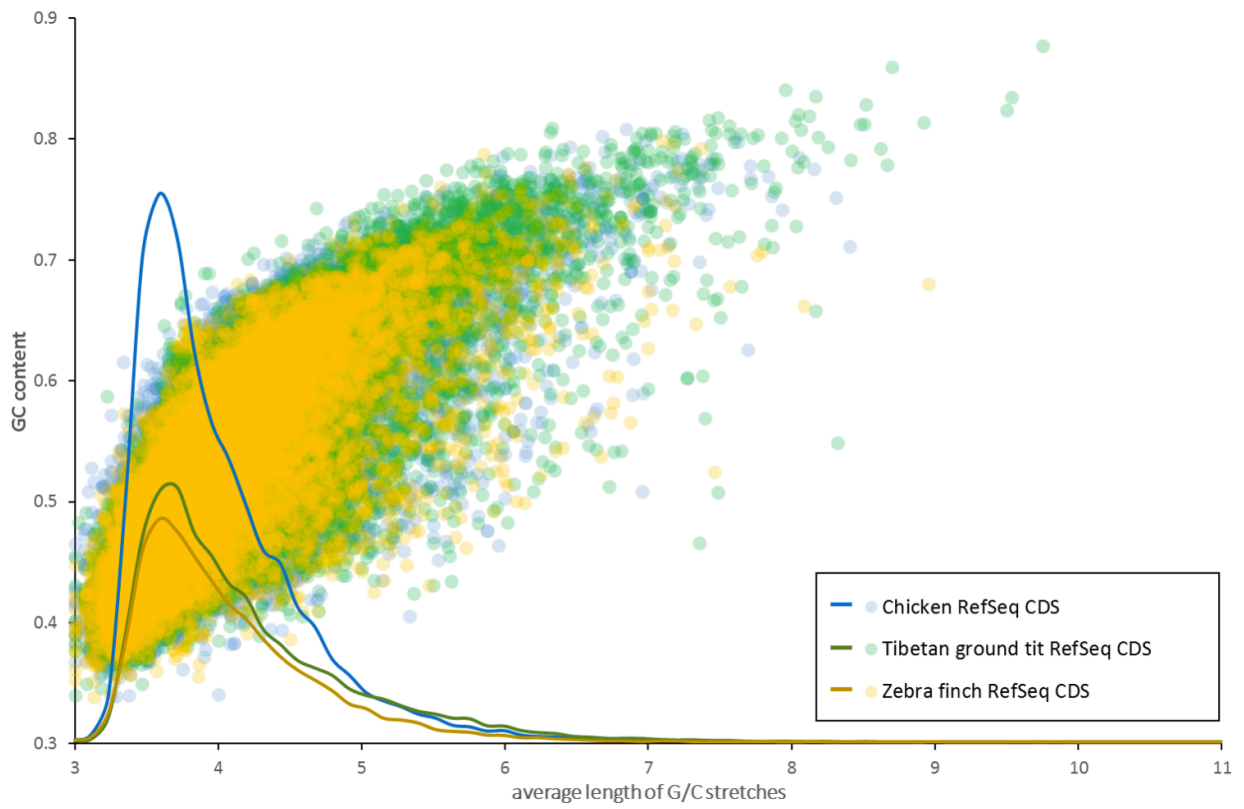

Supplement: 13059_2015_724_MOESM3_ESM.pdf [file 13059_2015_724_MOESM3_ESM.pdf]
