# Supplementary material for: Hidden genes in birds
Source: PubMed Central journal article supplement (PMC4539667; doi:10.1186/s13059-015-0724-z), 2015-08-18
Supplement: 13059_2015_724_MOESM4_ESM.pdf [file 13059_2015_724_MOESM4_ESM.pdf]

## Additional file 4

| Gene   | Organism                   | Gene ID   |
|--------|----------------------------|-----------|
| EPO    | Anolis carolinensis        | 637379669 |
| EPO    | Homo sapiens               | 62240996  |
| EPO    | Pelodiscus sinensis        | 558123633 |
| EPO    | Mus musculus               | 113931667 |
| EPOR   | Pelodiscus sinensis        | 558169966 |
| EPOR   | Chrysemys picta bellii     | 641780587 |
| EPOR   | Chelonia mydas             | 591366899 |
| EPOR   | Alligator mississippiensis | 564246600 |
| EPOR   | Homo sapiens               | 296040523 |
| EPOR   | Mus musculus               | 568958822 |
| EPOR   | Python bivittatus          | 602632393 |
| EPOR   | Anolis carolinensis        | 637264122 |
| LPPR2  | Chrysemys picta bellii     | 530660999 |
| LPPR2  | Homo sapiens               | 282400943 |
| LPPR2  | Alligator mississippiensis | 564246552 |
| LPPR2  | Anolis carolinensis        | 637264541 |
| LPPR2  | Python bivittatus          | 602632389 |
| LPPR2  | Mus musculus               | 592743502 |
| MMP14  | Chrysemys picta bellii     | 530593169 |
| MMP14  | Alligator sinensis         | 557328456 |
| MMP14  | Homo sapiens               | 526479827 |
| MMP14  | Anolis carolinensis        | 637354335 |
| MMP14  | Mus musculus               | 188528636 |
| POP7   | Pseudopodoces humilis      | 543381286 |
| POP7   | Chrysemys picta bellii     | 530660816 |
| POP7   | Alligator mississippiensis | 564247760 |
| POP7   | Pelodiscus sinensis        | 558123640 |
| POP7   | Homo sapiens               | 153791430 |
| POP7   | Mus musculus               | 209954833 |
| SWSAP1 | Mus musculus               | 244791056 |
| SWSAP1 | Pseudopodoces humilis      | 543382615 |
| SWSAP1 | Chrysemys picta bellii     | 530647204 |
| SWSAP1 | Chelonia mydas             | 591366901 |
| SWSAP1 | Anolis carolinensis        | 637264118 |
| SWSAP1 | Pelodiscus sinensis        | 558169970 |
| SWSAP1 | Homo sapiens               | 190684678 |
| SWSAP1 | Python bivittatus          | 602632391 |
